# Supplementary material for: Modulation of the Bile Acid Enterohepatic Cycle by Intestinal Microbiota Alleviates Alcohol Liver Disease
Source: MDPI journal article supplement (doi:10.3390/cells11060968), 2022-03-11
Supplement: s1 [file s1]

**Supplemental Table S1**

| Oligos    | 5' Forward 3'                     | 5' Reverse 3'                  |
|-----------|-----------------------------------|--------------------------------|
| ASBT      | TGG-GTT-TCT-TCC-TGG-CTA-GAC-T     | TGT-TCT-GCA-TTC-CAG-TTT-CCA-A  |
| BSEP      | GGA-TGG-TTT-GAC-TGC-ACT-TCT-G     | AGA-GGA-CTG-ACA-GCG-AGA-ATC-A  |
| Ccl2      | AGG-TCC-CTG-TCA-TGC-TTC-TG        | TCT-GGA-CCC-ATT-CCT-TCT-TG     |
| Ccl3      | Ref Qiagen : QT00248199           |                                |
| CCR2      | Ref Qiagen : QT02276813           |                                |
| CD36      | GTC-AAC-ATA-TTG-GTC-AAG-CCG-C     | CCA-CTC-CAA-TCC-CAA-GTA-AGG-C  |
| Cyp 7a1   | Ref Qiagen : QT00121569           |                                |
| Cyp 8b1   | Ref Qiagen : QT00155778           |                                |
| Cyp 27a1  | Ref Qiagen : QT00155778           |                                |
| Fabp1     | GAT-TTC-TGA-CAC-CCC-CTT-GA        | TGC-AGA-GCC-AGG-AGA-ACT-TT     |
| Fatp4     | CAC-GAA-TCA-GAA-CAG-AGA-GGC       | TGC-TTT-GGT-TTC-TGG-GAC-TT     |
| FGF15     | GAG-GAC-CAA-AAC-GAA-CGA-AAT-T     | ACG-TCC-TTG-ATG-GCA-ATC-G      |
| FXR       | CCA-ACC-TGG-GCT-TCT-ACC-C         | CAC-ACA-GCT-CAT-CCC-CTT-T      |
| Gapdh     | GTG-GAC-CTC-ATG-GCC-TAC-AT        | TGT-GAG-GGA-GAT-GCT-CAG-TG     |
| Glut2     | TCT-TCA-CGG-CTG-TCT-CTG-TG        | AAT-CAT-CCC-GGT-TAG-GAA-CA     |
| Glut5     | AGA-GCA-ACG-ATG-GAG-GAA-AA        | CCA-GAG-CAA-GGA-CCA-ATG-TC     |
| IBABP     | GAC-GGA-CAG-GAC-TTC-ACC-TG        | TTG-CCA-CCC-TCC-ATC-TTC-AC     |
| IL1b      | AAG-GTC-CAC-GGG-AAA-GAC-AC        | AGC-TTC-AGG-CAG-GCA-GTA-TC     |
| MDR1      | TAC-GAC-CCC-ATG-GCT-GGA-TC        | GGT-AGC-GAG-TCG-ATG-AAC-TG     |
| MRP2      | GCT-TCC-CAT-GGT-GAT-CTC-TTC       | ATC-ATC-GCT-TCC-CAG-GTA-CTG    |
| MRP3      | TAC-AGG-AAG-GCT-GTC-AT            | GGA-TCT-GCC-AGA-GGA-AGT-AT     |
| NOS2      | CCA-AGC-CCT-CAC-CTA-CTT-CC        | CTC-TGA-GGG-CTG-ACA-CAA-GG     |
| OSTa      | GTA-TTT-TCG-TGC-AGA-AGA-TGC-G     | TTT-CTG-TTT-GCC-AGG-ATG-CTC    |
| SGLT1     | CGG-AAG-AAG-GCA-TCT-GAG-AA        | AAT-CAG-CAC-GAG-GAT-GAA-CA     |
| SHP       | CGA-TCC-TCT-TCA-ACC-CAG-ATG       | AGG-GCT-CCA-AGA-CTT-CAC-ACA    |
| TGR5      | GTC-AGC-TCC-CTG-TTC-TTT-GC        | CAG-GAG-GCC-ATA-AAC-TTC-CA     |
| TNF alpha | CAT-CTT-CTC-AAA-ATT-CGA-GTG-ACA-A | TGG-GAG-TAG-ACA-AGG-TAC-AAC-CC |
| UCP1      | GCT-ACA-CGG-GGA-CCT-ACA-ATG       | CGT-CAT-CTG-CCA-GTA-TTT-TGT-T  |

**Table S1. Oligonucleotides used in this study.**
